# Supplementary material for: Durability of Response to Abrocitinib in Patients with Moderate-to-Severe Atopic Dermatitis After Treatment Discontinuation in a Phase 2b Trial
Source: Springer Nature journal article supplement (doi:10.1007/s13555-022-00764-4), 2022-08-07

## **SUPPLEMENTARY MATERIAL**

### **Durability of Response to Abrocitinib in Patients With Moderate-to-Severe Atopic Dermatitis After Treatment Discontinuation in a Phase 2b Trial**

Melinda J. Gooderham, Giampiero Girolomoni, Julian O. Moore, Jonathan I. Silverberg, Robert Bissonnette, Seth Forman, Elena Peeva, Pinaki Biswas, Hernan Valdez, Gary Chan

#### **Corresponding author:**

Gary Chan

Pfizer Inc.

445 Eastern Point Road

Groton, CT 06340

[gary.chan@pfizer.com](mailto:gary.chan@pfizer.com)

**Supplementary Table 1.** The list of participating Institutional Review Boards (IRBs) or Ethic Committees (ECs)

| <b>Study Site Number</b>                          | <b>IRB or EC</b>                                                                                                                                                                                                                  |
|---------------------------------------------------|-----------------------------------------------------------------------------------------------------------------------------------------------------------------------------------------------------------------------------------|
| <b>Australia</b>                                  |                                                                                                                                                                                                                                   |
| 1036                                              | Melbourne Health Human Research Ethics Committee<br>Royal Melbourne Hospital, Grattan Street<br>Parkville, VIC 3050<br>Australia                                                                                                  |
| 1035, 1043, 1046, 1052,<br>1056, 1079, 1086       | Bellberry Limited Human Research Ethics Committee<br>129 Glen Osmond Road<br>Eastwood, SA 5063<br>Australia                                                                                                                       |
| <b>Canada</b>                                     |                                                                                                                                                                                                                                   |
| 1037, 1040, 1071, 1090                            | Western Institutional Review Board<br>1019 39TH AVE SE, Ste 120<br>Puyallup, WA 98374-2115<br>USA                                                                                                                                 |
| 1038, 1039, 1045, 1047,<br>1072                   | Research Review Board Inc.<br>19 - 13085 Yonge Street, Suite 203<br>Richmond Hill, ON L4E 0K2<br>Canada                                                                                                                           |
| 1070                                              | The University of British Columbia Office of Research Ethics<br>Clinical Research Ethics Board<br>Room 210, 828 West 10th Avenue<br>Vancouver, BC V5Z 1L8<br>Canada                                                               |
| 1073                                              | University of Manitoba Bannatyne Campus Research Ethics<br>Boards Biomedical Research Ethics Board<br>Ethics Boards Biomedical Research Ethics Board (BREB), 770<br>Bannatyne Avenue, Room P126<br>Winnipeg, MB R3E 0W3<br>Canada |
| <b>Germany</b>                                    |                                                                                                                                                                                                                                   |
| 1031, 1033, 1034, 1041,<br>1055, 1074, 1077, 1085 | Ethikkommission der Universität zu Lübeck<br>Haus 2, Ratzeburger Allee 160<br>Lübeck, 23562<br>Germany                                                                                                                            |
| <b>Hungary</b>                                    |                                                                                                                                                                                                                                   |
| 1080, 1082, 1083, 1084                            | Egeszsegugyi Tudomanyos Tanacs, Klinikai Farmakologiai<br>Etikai Bizottsaga<br>Arany Janos utca 6-8<br>Budapest, 1051<br>Hungary                                                                                                  |
| <b>United States</b>                              |                                                                                                                                                                                                                                   |

|                                                                                                                                                                                                                                                                 |                                                                                                                                                                        |
|-----------------------------------------------------------------------------------------------------------------------------------------------------------------------------------------------------------------------------------------------------------------|------------------------------------------------------------------------------------------------------------------------------------------------------------------------|
| <p>1001, 1002, 1003, 1004,<br/> 1005, 1006, 1008, 1009,<br/> 1010, 1012, 1013, 1014,<br/> 1015, 1018, 1019, 1021,<br/> 1023, 1024, 1027, 1028,<br/> 1029, 1030, 1049, 1050,<br/> 1058, 1059, 1060, 1062,<br/> 1063, 1064, 1066, 1076,<br/> 1078, 1091, 1092</p> | <p>Copernicus Group IRB<br/> One Triangle Dr, Suite 100<br/> Durham, NC 27713<br/> USA</p>                                                                             |
| <p>1067</p>                                                                                                                                                                                                                                                     | <p>Human Subjects Protection Office (HSPO) &amp; Institutional<br/> Review Board<br/> UConn Health<br/> 263 Farmington Ave<br/> Farmington, CT 06030-1511<br/> USA</p> |
| <p>1069</p>                                                                                                                                                                                                                                                     | <p>Western Institutional Review Board<br/> 1019 39TH AVE SE, Ste 120<br/> Puyallup, WA 98374-2115<br/> USA</p>                                                         |
| <p>1075</p>                                                                                                                                                                                                                                                     | <p>IRB Human Research Protection Program<br/> 150 Munson St, 3rd Fl, PO Box 208317<br/> New Haven, CT 06520-8327<br/> USA</p>                                          |

**Supplementary Fig. 1** Effect of abrocitinib on biomarkers during abrocitinib treatment and discontinuation. Median concentration of serum (a) high-sensitivity C-reactive protein, (b) interleukin-31, (c) eosinophil percentage, and (d) thymus and activation-regulated chemokine. *hs-CRP* high-sensitivity C-reactive protein, *IL-31* interleukin-31, *TARC* thymus and activation-regulated chemokine.

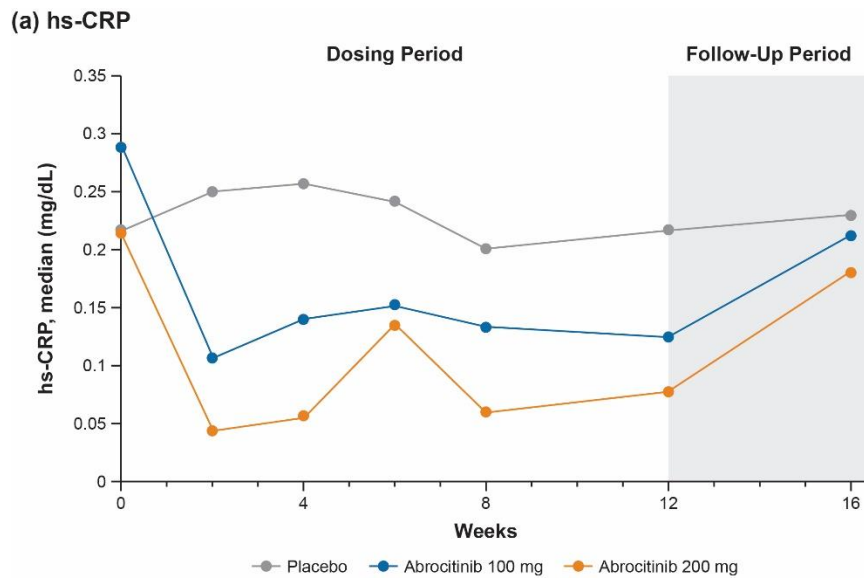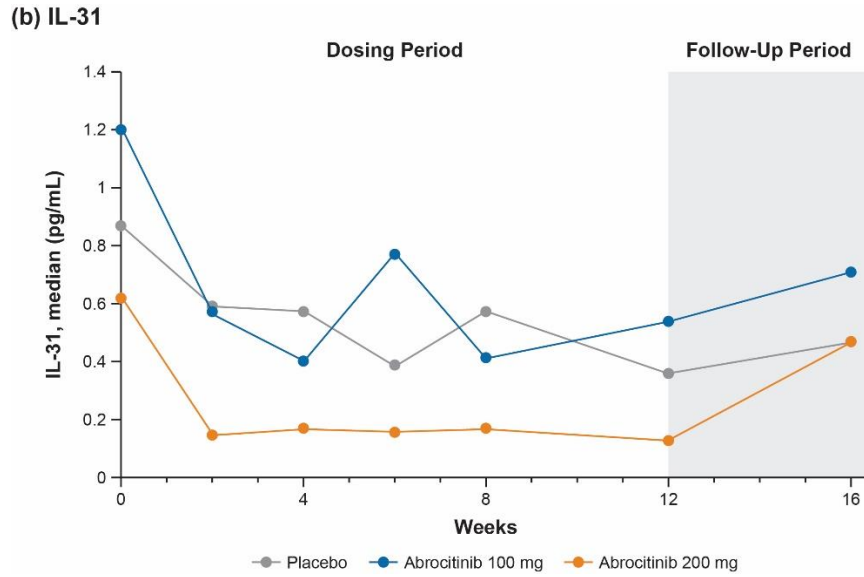

(c) Eosinophil %

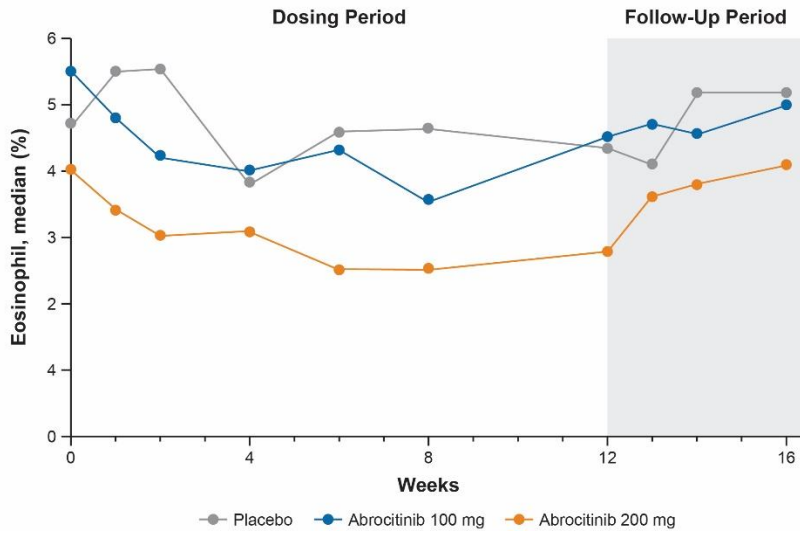

(d) TARC

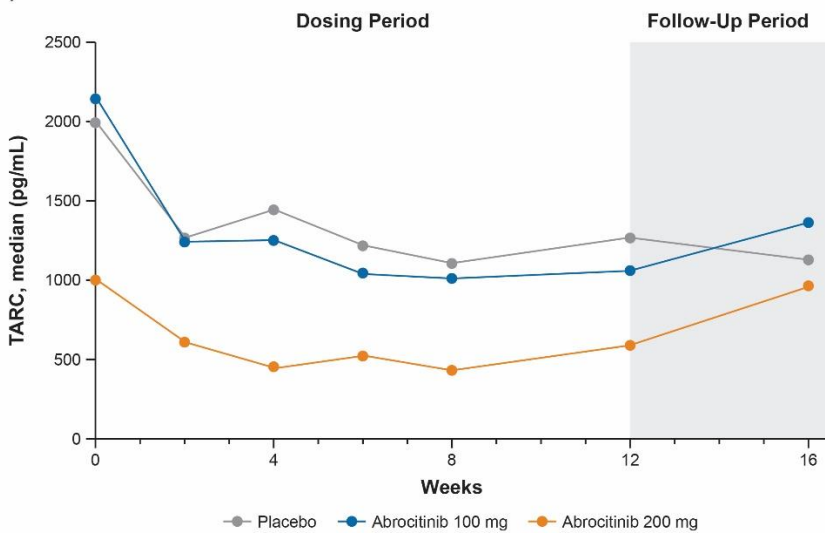

Supplement: MOESM1 [file 23344234]
